# Supplementary figures and images for: [Retracted] Synthesis and Evaluation of Finasteride‐Loaded HPMC‐Based Nanogels for Transdermal Delivery: A Versatile Nanoscopic Platform
Source: Hindawi journal article supplement (doi:10.1155/2022/2426960), 2022-01-01

# Graphical Abstract


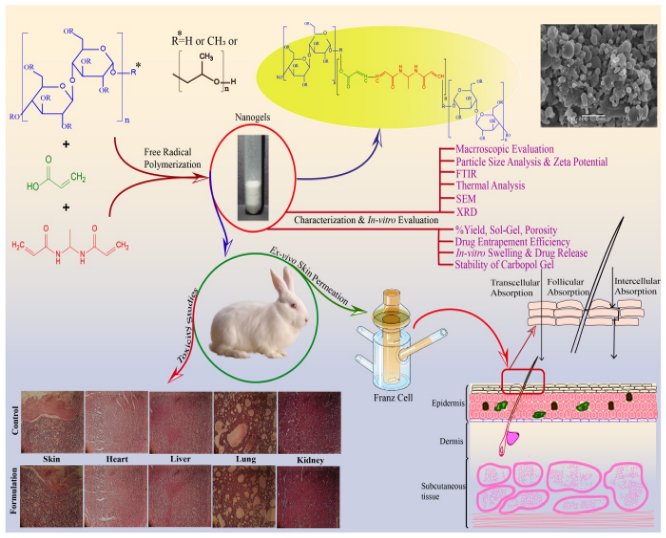

Supplement: f1 [file 2426960.f1.docx]
